# Supplementary material for: MFA zeotype catalyst: a greener approach for the synthesis of INH azomethine scaffolds
Source: Royal Society of Chemistry journal article supplement (doi:10.1039/c5ra03528g), 2015-01-01

## Green and Efficient Synthesis of Azomethine Derivatives of INH: MFA as an Excellent Zeotype Catalyst

Devendra S. Raghuvanshi,<sup>[a]</sup> Pramod P. Mahulikar,<sup>[a]</sup> Jyotsna S. Meshram\*<sup>[a]</sup>

<sup>[a]</sup>School of Chemical Sciences, North Maharashtra University, Jalgaon (MS) India.

drjmeshram@gmail.com

### EDXS Analysis of MFA

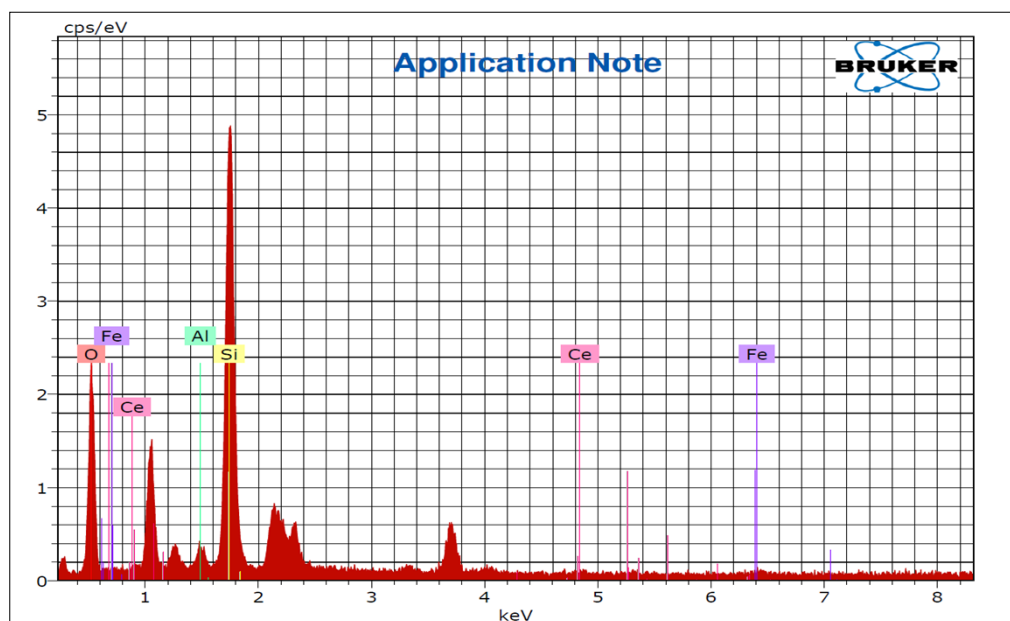

Spectrum: 1740

| El     | AN | Series   | unn. C<br>[wt.%] | norm. C<br>[wt.%] | Atom. C<br>[at.%] | Error (1 Sigma)<br>[wt.%] |
|--------|----|----------|------------------|-------------------|-------------------|---------------------------|
| O      | 8  | K-series | 22.38            | 34.42             | 60.86             | 3.39                      |
| Al     | 13 | K-series | 0.76             | 1.16              | 1.22              | 0.08                      |
| Si     | 14 | K-series | 17.87            | 27.48             | 27.68             | 0.79                      |
| Fe     | 26 | K-series | 5.95             | 9.15              | 4.63              | 0.08                      |
| Ce     | 58 | L-series | 18.06            | 27.79             | 5.61              | 0.75                      |
| Total: |    |          | 65.01            | 100.00            | 100.00            |                           |

## Characterizations of (E)-N'-(Substituted-benzylidene) isonicotinohydrazone Derivatives

### 3a: (E)-N'-benzylidene isonicotinohydrazone

#### Mass Analysis

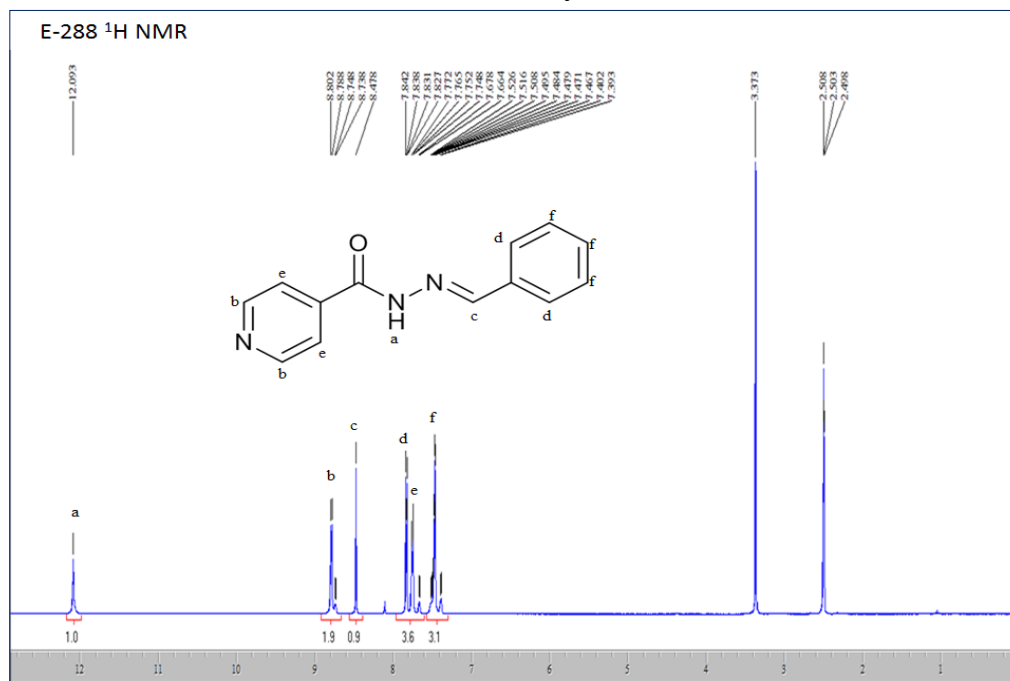

#### $^1\text{H}$ NMR Spectra

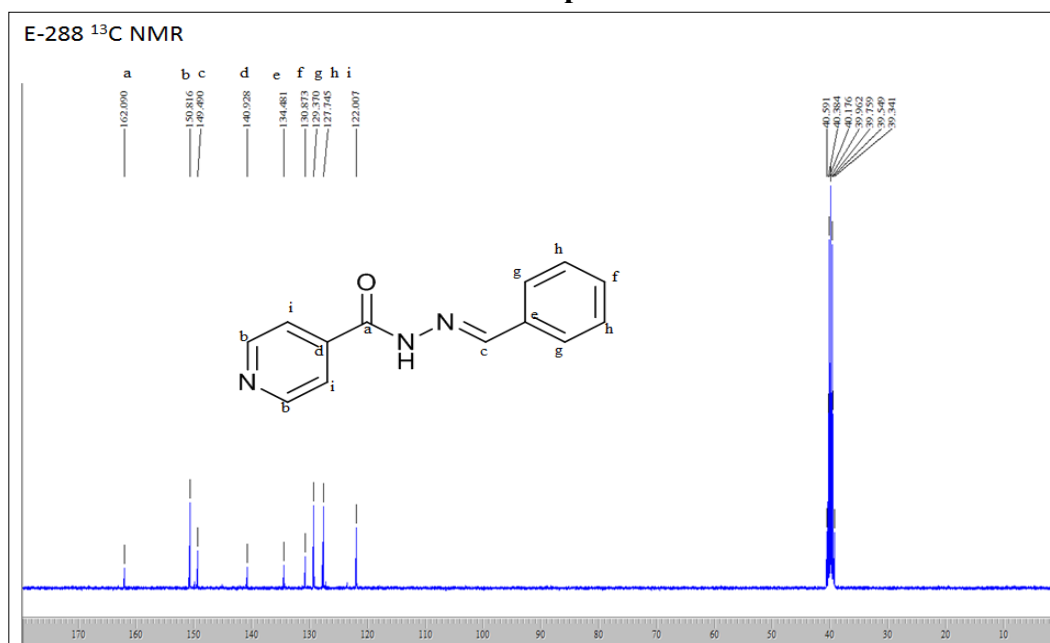

### 3b: (E)-N'-(4-hydroxybenzylidene) isonicotinohydrazide

#### Mass Analysis

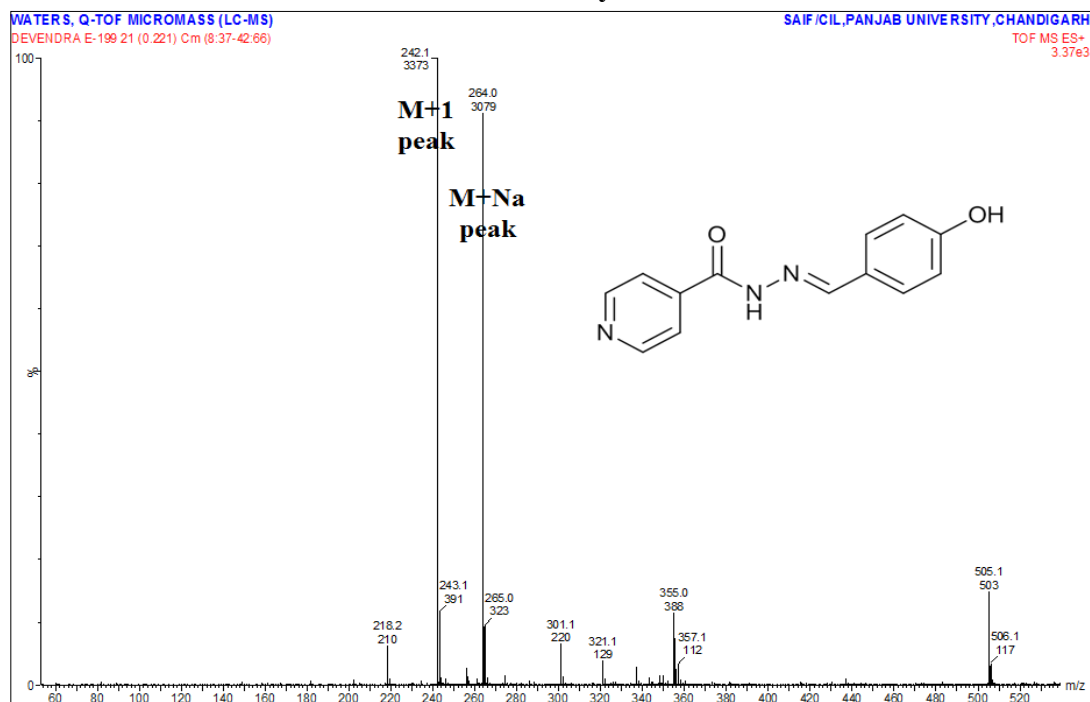

#### <sup>1</sup>H NMR Spectra

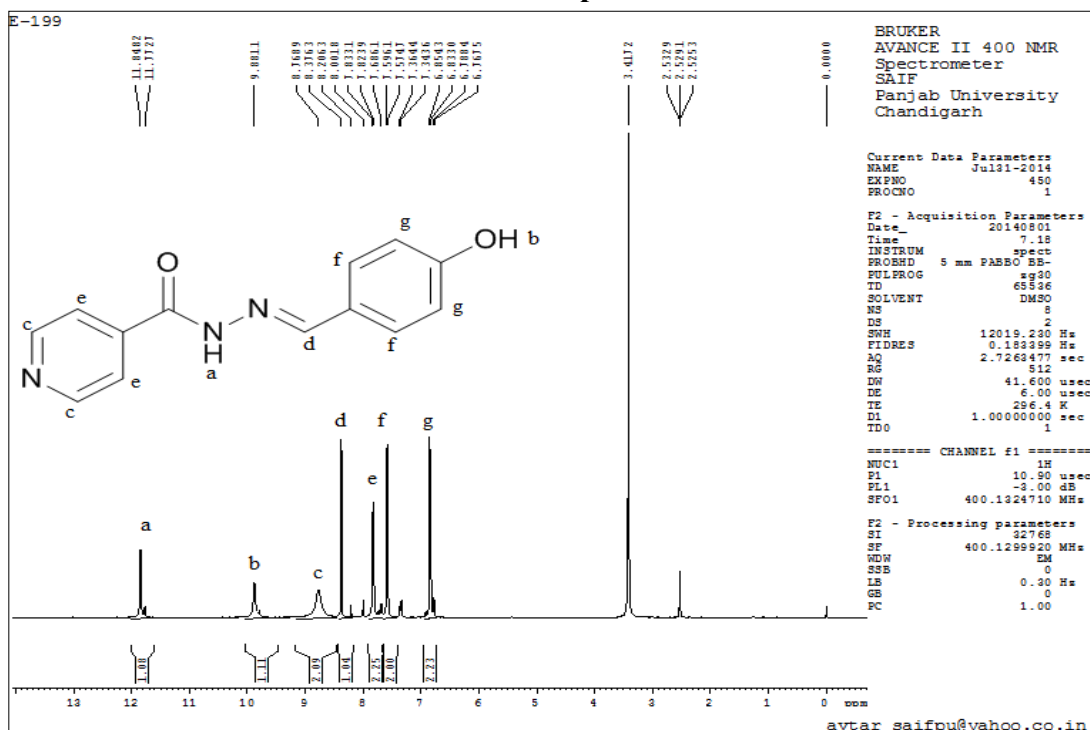

### C<sup>13</sup> NMR Spectra

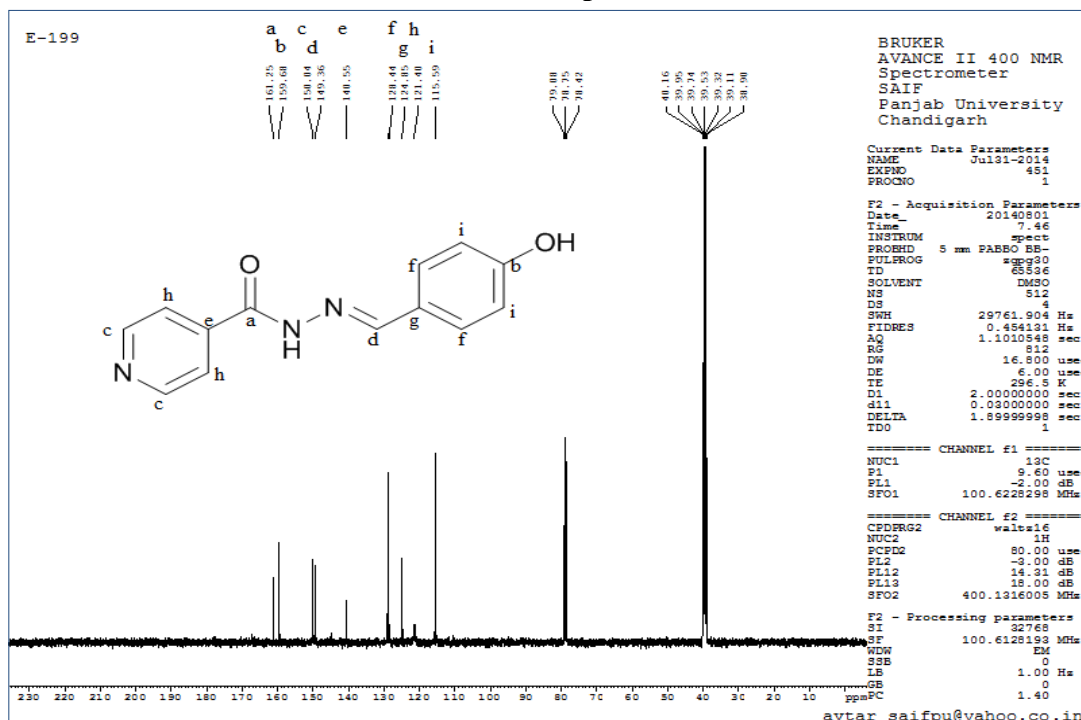

**3c:** (*E*)-*N'*-(2-hydroxybenzylidene) isonicotinohydrazide

### Mass Analysis

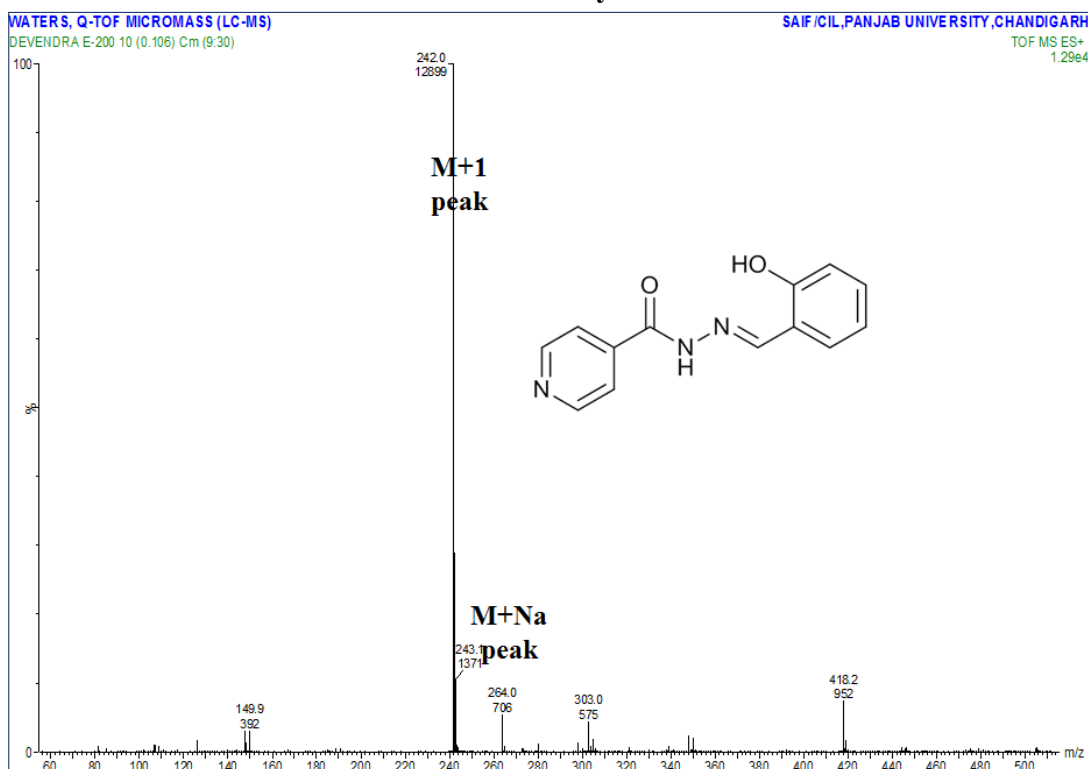



### 3d: (E)-N'-(3-hydroxybenzylidene) isonicotinohydrazide

#### HRMS Analysis

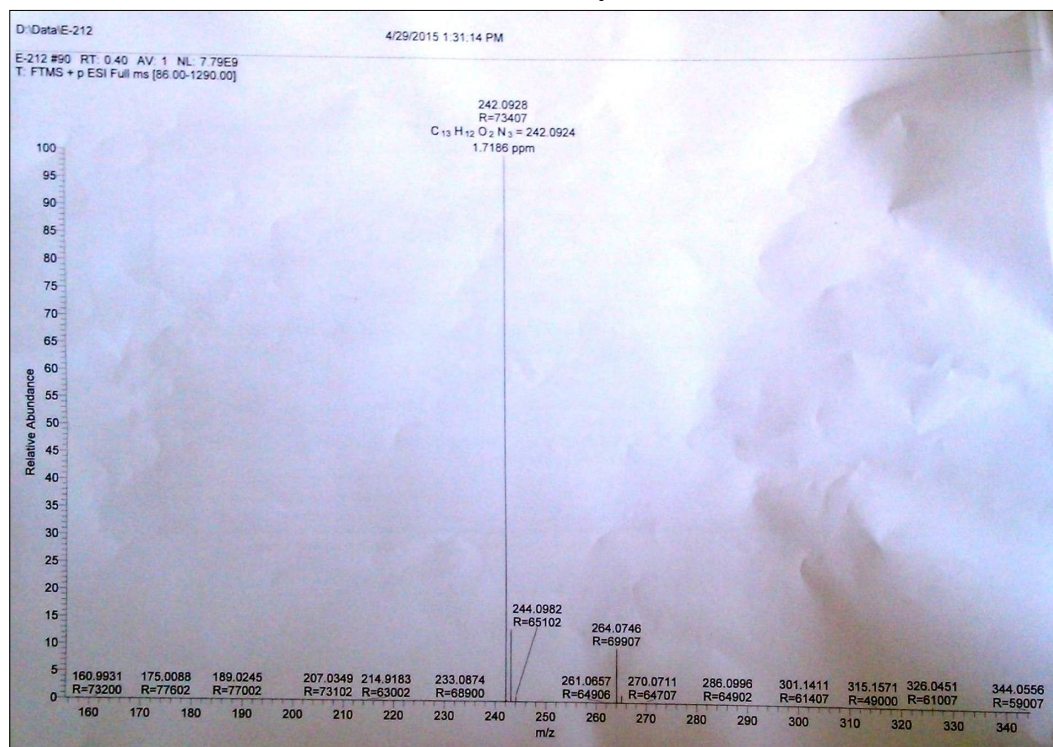

#### Mass Analysis

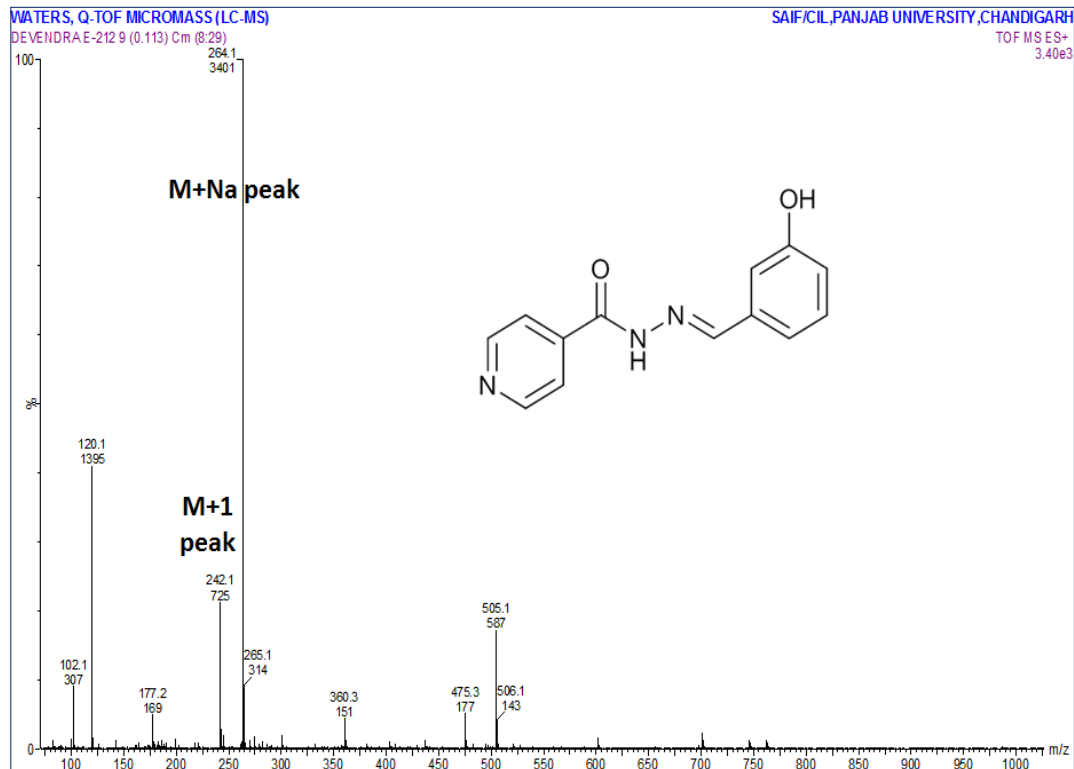



## HRMS Analysis

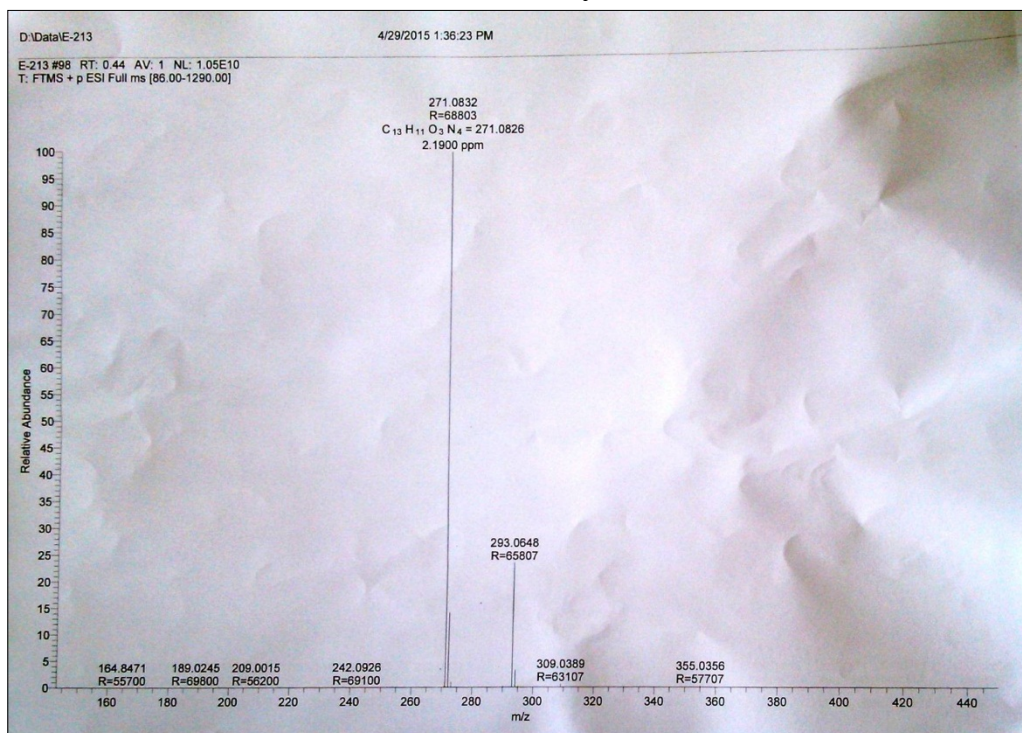

## Mass Analysis

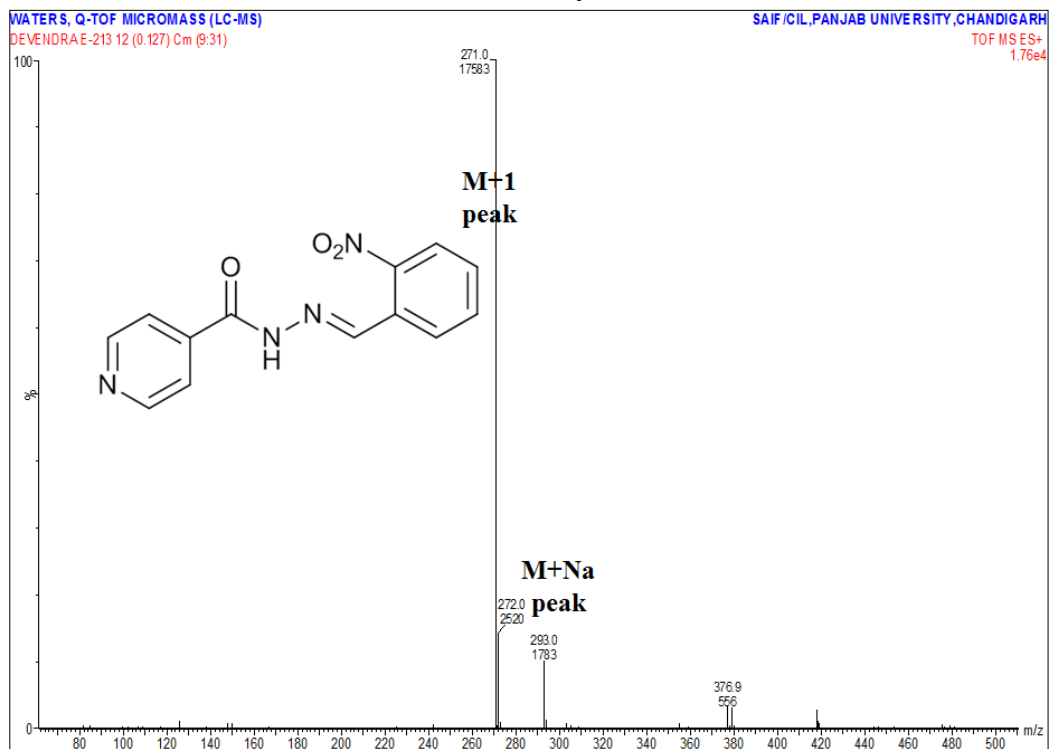





### 3f: (E)-N'-(4-nitrobenzylidene) isonicotinohydrazide

#### Mass Analysis

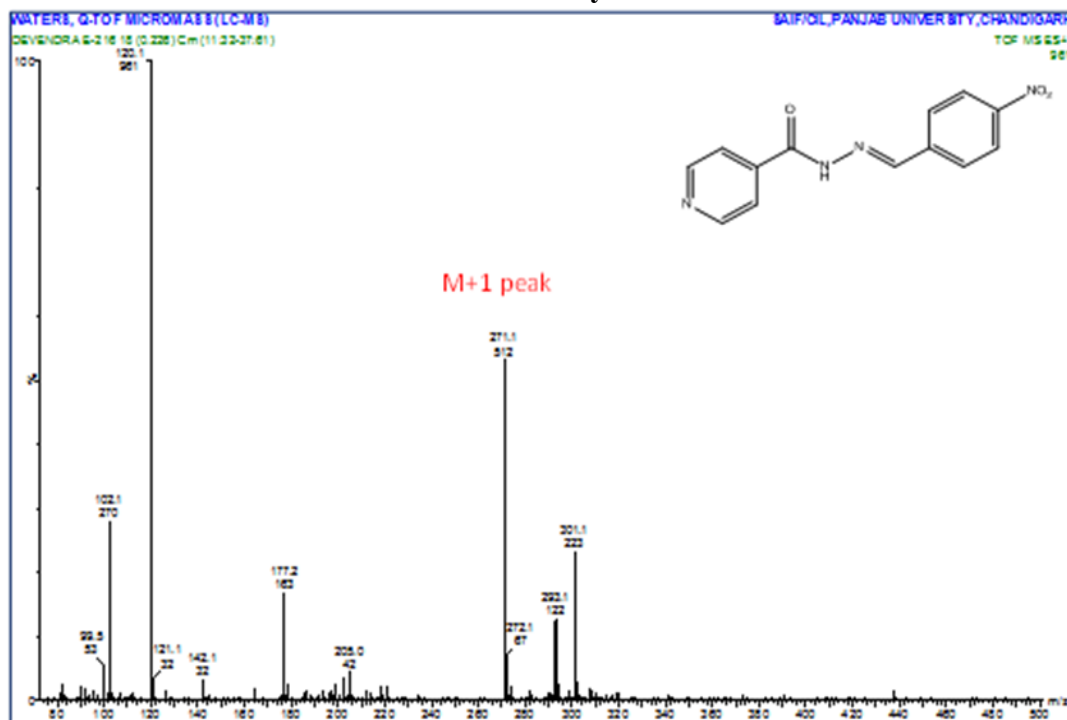

#### <sup>1</sup>H NMR Spectra

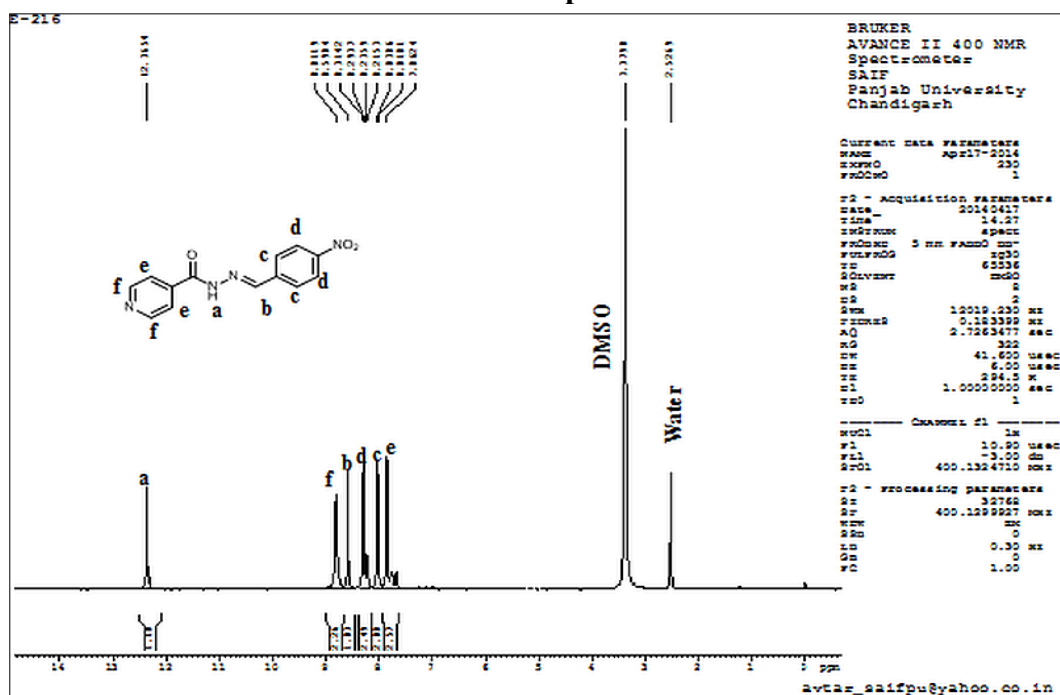

### 3g: (E)-N'-(anthracene-9-ylmethylene) isonicotinohydrazide

#### HRMS Analysis

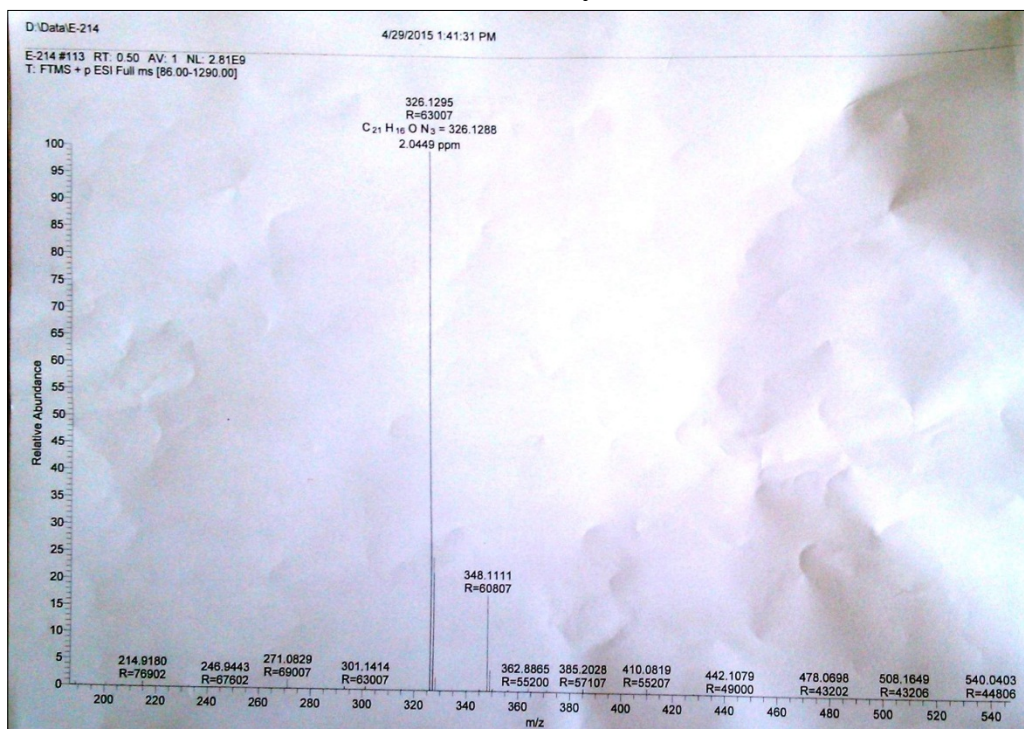

#### Mass Analysis

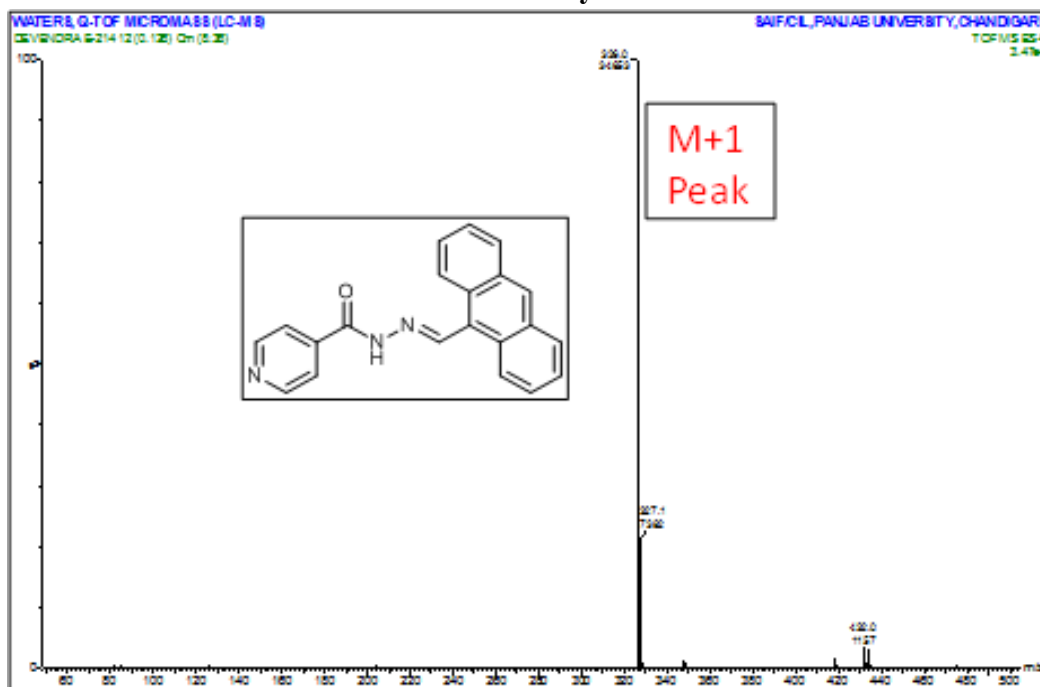

# H<sup>1</sup> NMR Spectra

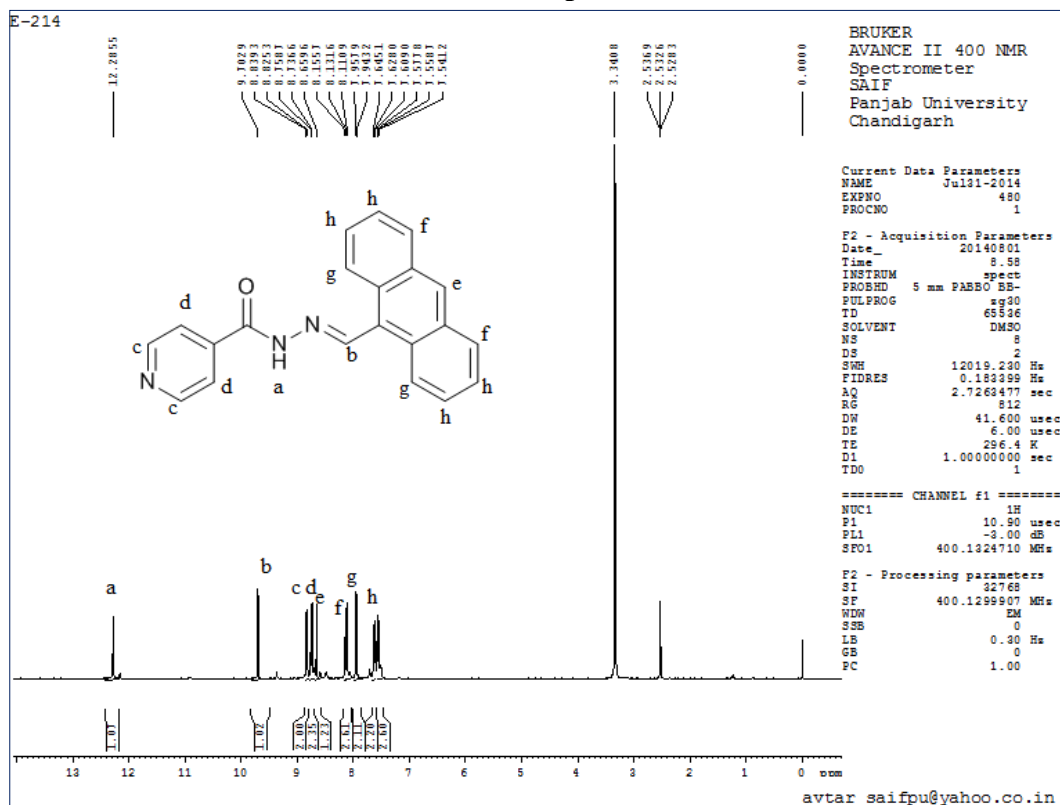

# C<sup>13</sup> NMR Spectra

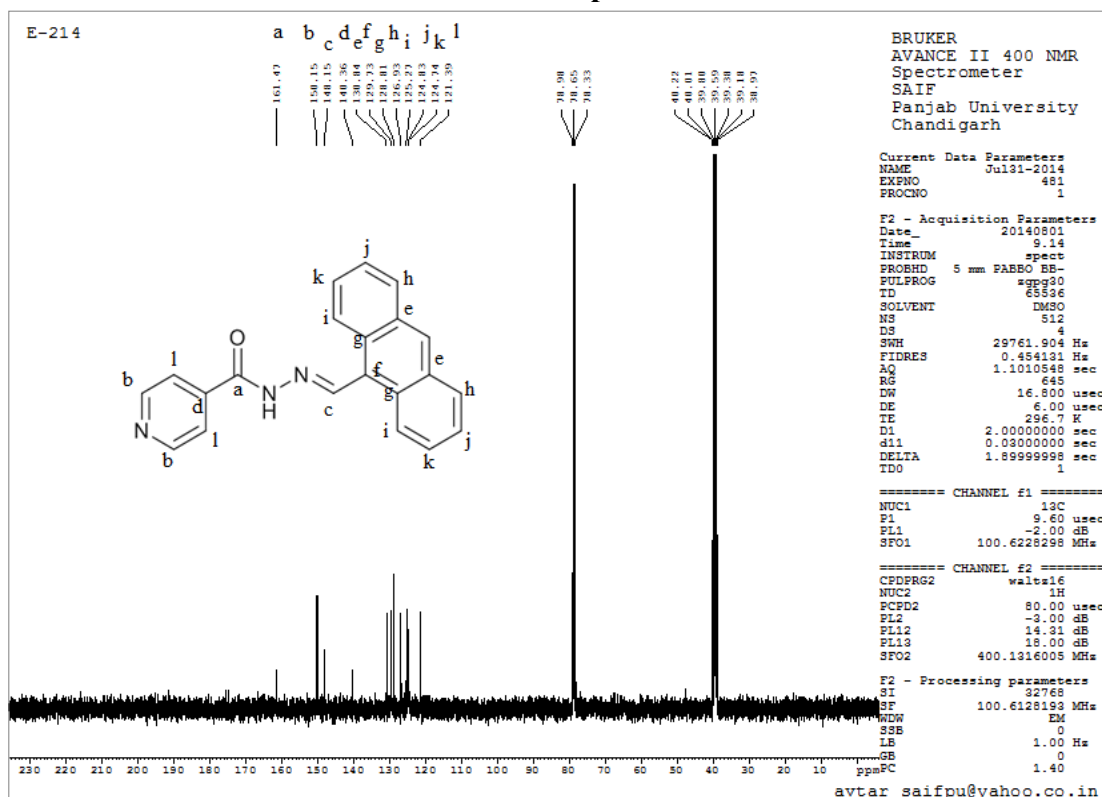

### 3h: (E)-N'-((1H-indole-3-yl) methylene) isonicotinohydrazide

#### HRMS Analysis

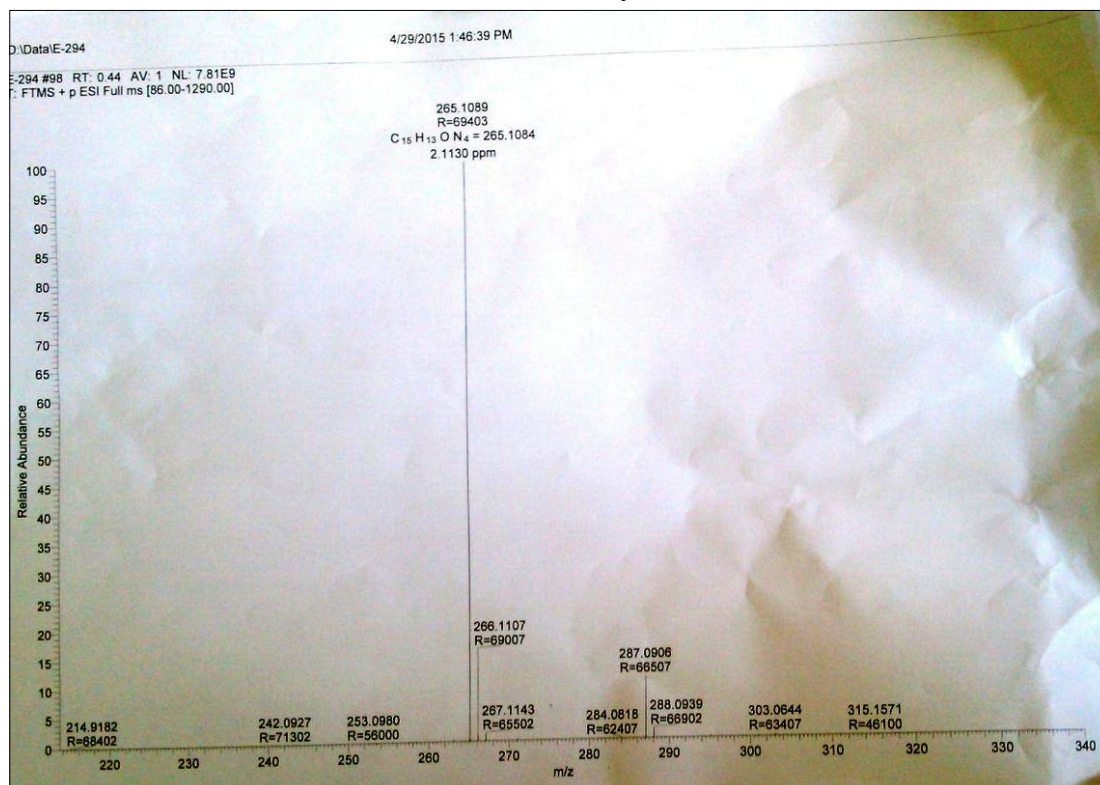

#### Mass Analysis

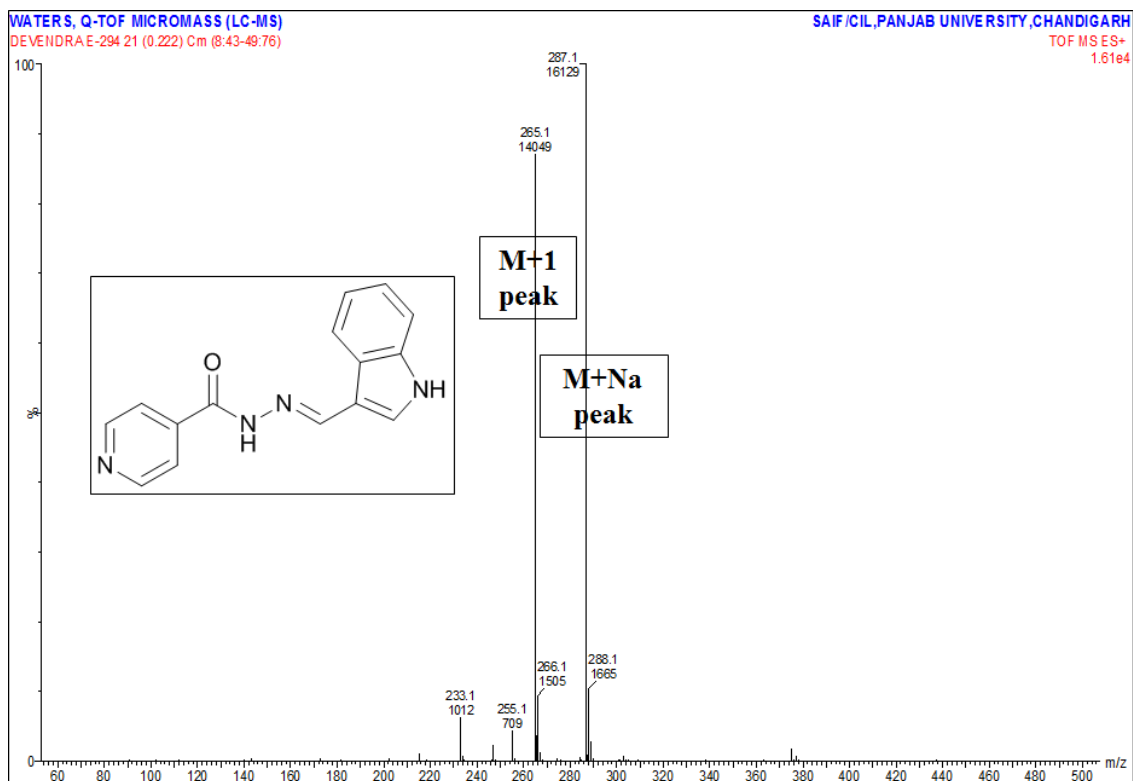

# H<sup>1</sup> NMR Spectra

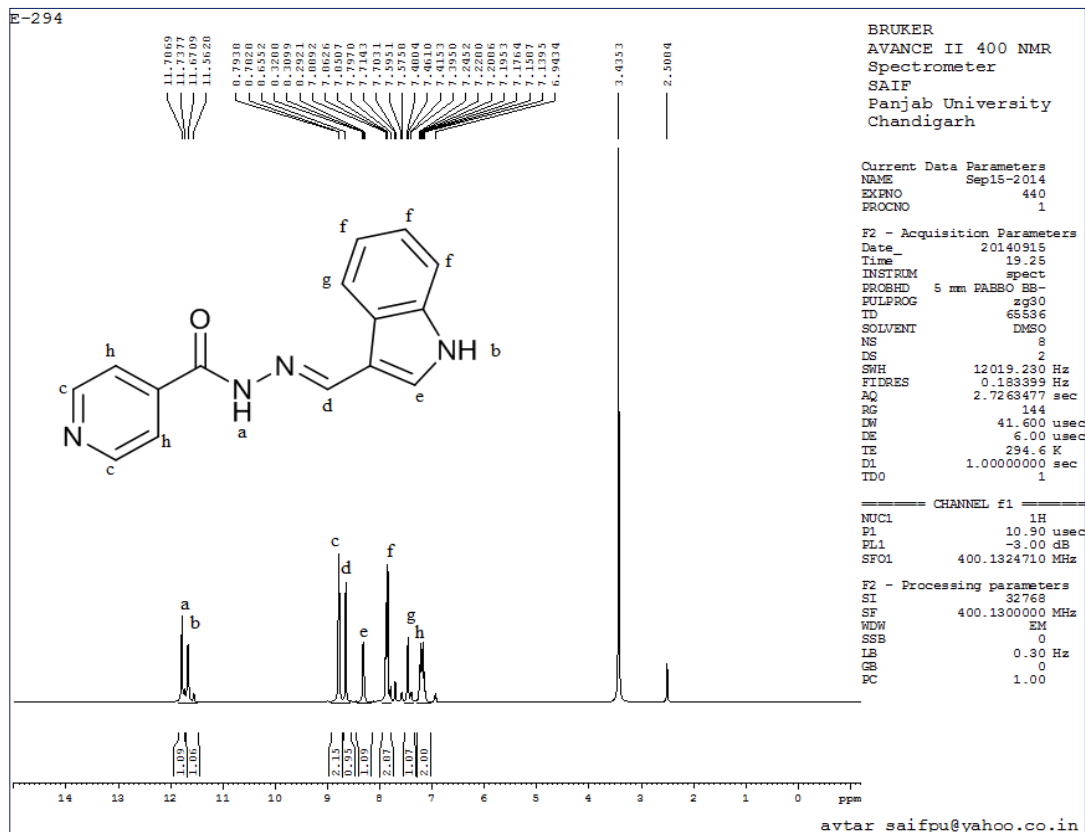

Supplement: c5ra03528g1.pdf [file c5ra03528g1.pdf]
